# Supplementary material for: Epigenetic modifications of the Zfp/ZNF423 gene control murine adipogenic commitment and are dysregulated in human hypertrophic obesity
Source: PubMed Central journal article supplement (PMC6448963; doi:10.1007/s00125-017-4471-4), 2017-10-24
Supplement: 125_2017_4471_MOESM1_ESM.pdf [file 125_2017_4471_MOESM1_ESM.pdf]

## **Electronic supplementary material (ESM)**

### **ESM Methods**

**Cell culture and adipocyte differentiation.** For adipocyte differentiation, cells were grown to confluence in medium containing 10% FCS. Two days after reaching confluence, the cells were cultured in DMEM supplemented with a differentiation cocktail containing 5µg/ml insulin, 0.5mmol/l 3-isobutyl-1-methylxanthine, 1mol/l dexamethasone, 1 µmol/l rosiglitazone and 10% FBS for 2 days. Forty-eight hours after induction, cells were maintained in DMEM containing 5µg/ml insulin and 10% FBS until they were ready for collection. The NIH-3T3 cells were cultured in the presence or the absence 5-Azacytidine (5µmol/l) for 6h before the administration of differentiation cocktail. Lipid accumulation of mature adipocytes was determined by Oil Red O staining as reported in [13]. The cells were incubated for 60 min at RT in Oil Red O staining solution. Images were taken using an Olympus microscope system (Center Valley, PA, USA). For quantification, absorbance was measured at 510 nm using a spectrophotometer (Beckman, CA, USA).

## **ESM Tables**

| Gene                                 | Forward/Reverse    | Primer (5' to 3')                                                |
|--------------------------------------|--------------------|------------------------------------------------------------------|
| <i>Pparγ2</i><br><i>mRNA</i>         | Forward<br>Reverse | CAGTGGAGACCGCCCAGGCT<br>TGGAGCAGGGGGTGAAGGCT                     |
| <i>Fabp4</i><br><i>mRNA</i>          | Forward<br>Reverse | TCTCACCTGGAAGACAGCTCC<br>GCTGATGATCATGTTGGGCTTGG                 |
| <i>Glut4</i><br><i>mRNA</i>          | Forward<br>Reverse | CAGAAGGTGATTGAACAGAG<br>AATGATGCCAATGAGAAA                       |
| <i>Adipoq</i><br><i>mRNA</i>         | Forward<br>Reverse | GTGACGACACCAAAGGGGCTC<br>TCCAACCTGCACAAGTTCCC                    |
| <i>Ppia</i><br><i>mRNA</i>           | Forward<br>Reverse | GCAGACAAAGTTCCAAAGACAG<br>CACCTGGCACATGAATCC                     |
| <i>Zfp423</i><br><i>mRNA</i>         | Forward<br>Reverse | GGTTTTATTATGTGTTTTGTAGTGTA<br>ATATCCCTCAACTCAACCTACTTAA          |
| <i>ZNF423</i><br><i>mRNA</i>         | Forward<br>Reverse | AGGCCTAGAAGGAGAGCCAG<br>TCGTCATCACCATCTCCAGG                     |
| <i>Zfp423</i> NUC 1<br><i>MNase</i>  | Forward<br>Reverse | CCCGCACGGGCCTGTTA<br>CTCTGACAGCACTGGGCA                          |
| <i>Zfp423</i> NUC 2<br><i>MNase</i>  | Forward<br>Reverse | TGTGGCCGGACGCCTG<br>CCTTCTCCTCCGCCCTTG                           |
| <i>Zfp423</i> CTRL R<br><i>MNase</i> | Forward<br>Reverse | GCCCGAGGGCAGGCA<br>GCACGGGCATTGCTCAG                             |
| <i>Zfp423</i><br><i>Bisulfite</i>    | Forward<br>Reverse | GGTTTTATTATGTGTTTTGTAGTGTA<br>ATATCCCTCAACTCAACCTACTTAA          |
| <i>ZNF423</i><br><i>Bisulfite</i>    | Forward<br>Reverse | GAGAGGAGGAAGAAATTTAGGGTGGGGTG<br>ACTCAAACAATCCTCAATACCTAAAAAATAC |

**ESM Table 1.** List of primers used in this study

## ESM Figures

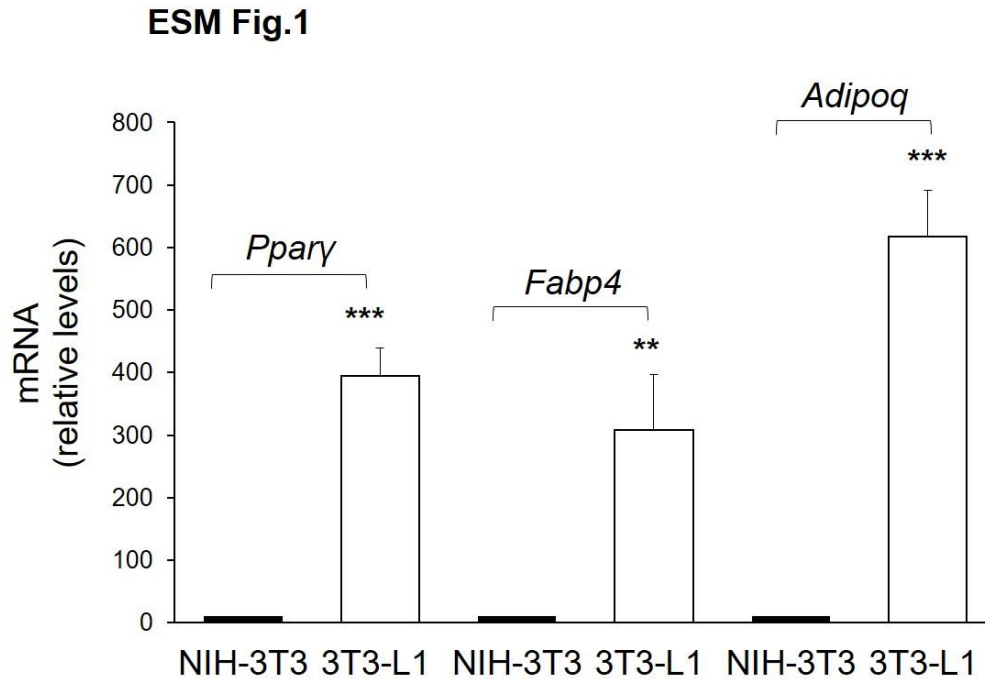

**ESM Fig.1. Adipocyte marker genes in NIH-3T3 and 3T3-L1 cells.** Total RNA was isolated from the cells and the relative mRNA levels of *Pparγ*, *Fabp4*, and *Adipoq* were determined by qPCR. Data normalisation has been performed using the housekeeping *Ppia* gene as internal control. Results are the means  $\pm$  SD of three independent experiments. Statistical significance was established by 2-tail Student's t-test (\*\* $p < 0.01$ , and \*\*\* $p < 0.001$ ).

**ESM Fig.2**

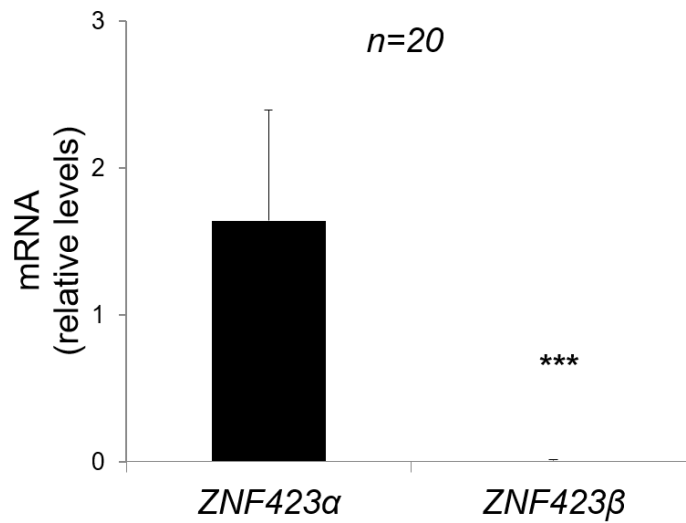

**ESM Fig.2. Expression of *ZNF423α* and *β* isoforms in SVF preadipocytes.** Expression of *ZNF423α* (NM\_015069) and *ZNF423β* (NM\_001271620) mRNA was measured by qPCR. Data normalisation has been performed using the housekeeping *Ppia* gene ( $2^{-\Delta\text{CT}} \times 1000$ ) as internal control. Results are the means  $\pm$  SD, with *n* equal to the number of sample analysed. Statistical significance was established by 2-tail Student's t-test (\*\* $p < 0.001$ ).
